# Supplementary material
Source: MDPI journal article supplement (https://www.mdpi.com/2305-6320/8/5/23)
Supplement: s1 [file s1]

## Supplementary Materials: Discovery of Novel eEF2K Inhibitors Using HTS Fingerprint Generated from Predicted Profiling of Compound–Protein Interactions

Atsushi Yoshimori, Enzo Kawasaki, Ryuta Murakami and Chisato Kanai

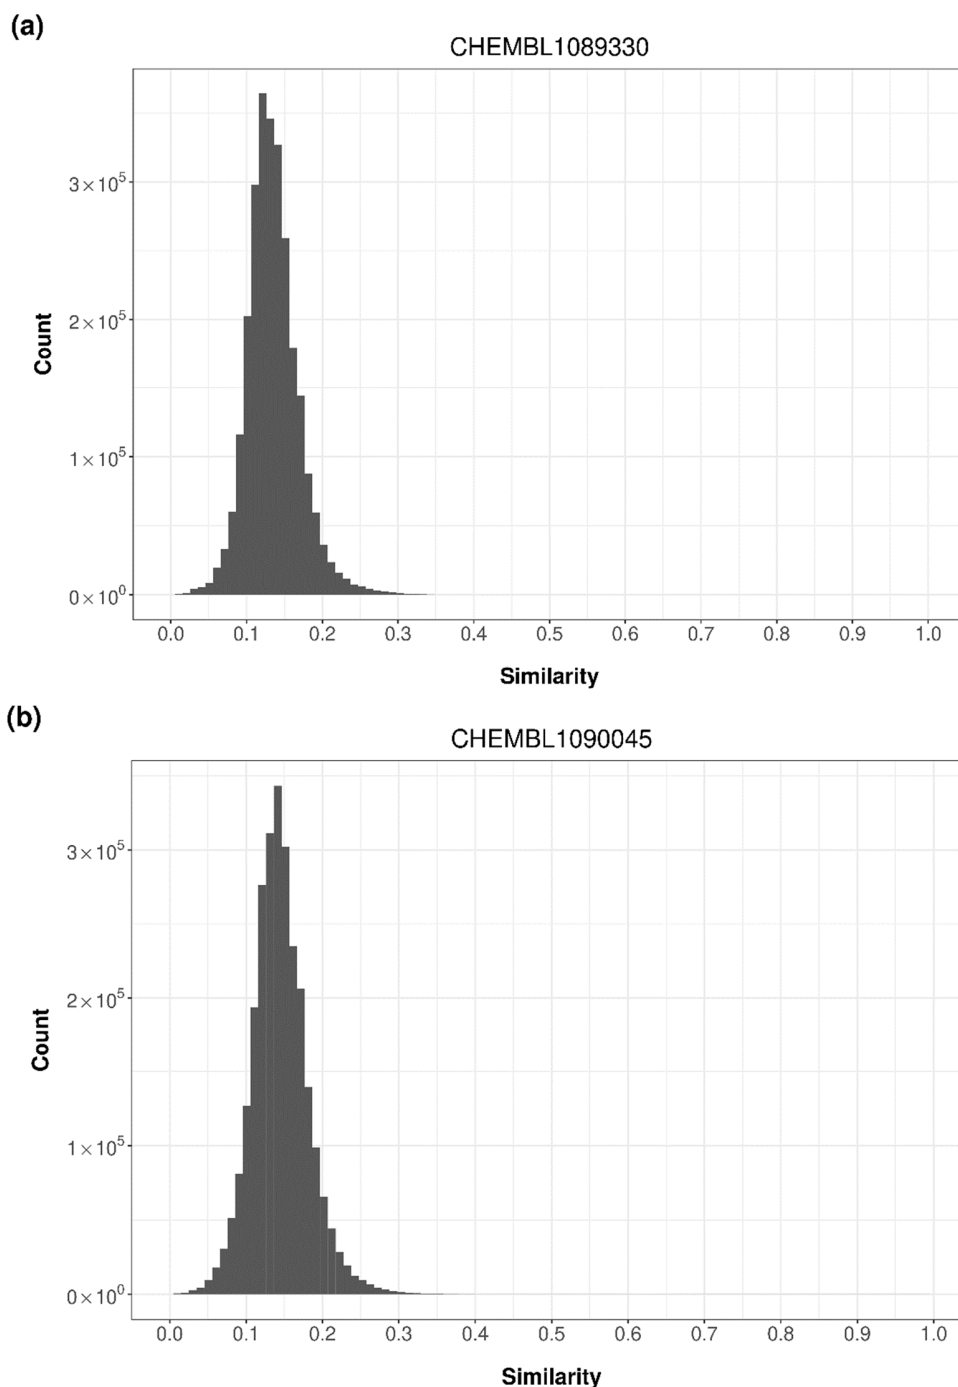

**Figure S1.** Histogram of similarity between Enamine library (2.6 million) and reference compounds. Similarities are calculated by Tanimoto coefficient with Morgan fingerprints (radius = 2 and bit length = 2048) using RDKit software. Histogram (a) is for reference compound CHEMBL1089330 and (b) is for reference compound CHEMBL1090045.

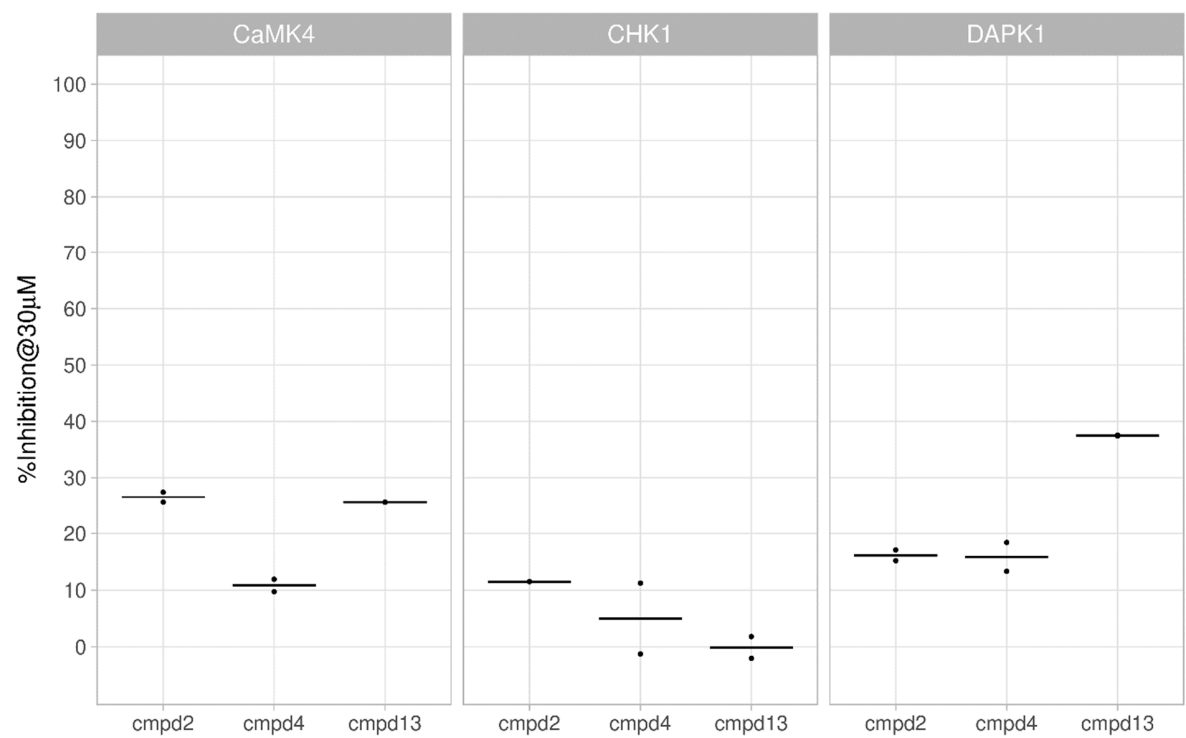

**Figure S2.** Inhibitory activities of the 3 inhibitors identified in this study against calmodulin-related kinases.

**Table S1.** List of target proteins included in the generation of CGBFP.

| ID | Protein Name                                             | UniProt Entry Name |
|----|----------------------------------------------------------|--------------------|
| 1  | Adenosine receptor A2a                                   | AA2AR HUMAN        |
| 2  | Adenosine receptor A1                                    | AA1R HUMAN         |
| 3  | Adenosine receptor A2b                                   | AA2BR HUMAN        |
| 4  | Activated CDC42 kinase 1                                 | ACK1 HUMAN         |
| 5  | Aurora kinase A                                          | AURKA HUMAN        |
| 6  | Aurora kinase B                                          | AURKB HUMAN        |
| 7  | Beta-secretase 1                                         | BACE1 HUMAN        |
| 8  | Beta-secretase 2                                         | BACE2 HUMAN        |
| 9  | B1 bradykinin receptor                                   | BKRB1 HUMAN        |
| 10 | B2 bradykinin receptor                                   | BKRB2 HUMAN        |
| 11 | Serine/threonine-protein kinase B-raf                    | BRAF HUMAN         |
| 12 | Cathepsin S                                              | CATS HUMAN         |
| 13 | C-C chemokine receptor type 5                            | CCR5 HUMAN         |
| 14 | Cyclin-dependent kinase 9                                | CDK9 HUMAN         |
| 15 | Macrophage colony-stimulating factor 1 receptor          | CSF1R HUMAN        |
| 16 | Ephrin type-A receptor 2                                 | EPHA2 HUMAN        |
| 17 | Tyrosine-protein kinase Fer                              | FER HUMAN          |
| 18 | Gamma-aminobutyric acid receptor subunit alpha-1         | GBRA1 HUMAN        |
| 19 | Glucagon receptor                                        | GLR HUMAN          |
| 20 | G-protein coupled receptor 55                            | GPR55 HUMAN        |
| 21 | G-protein coupled receptor 6                             | GPR6 HUMAN         |
| 22 | Insulin-degrading enzyme                                 | IDE HUMAN          |
| 23 | Insulin-like growth factor 1 receptor                    | IGF1R HUMAN        |
| 24 | Potassium voltage-gated channel subfamily A member 3     | KCNA3 HUMAN        |
| 25 | Potassium voltage-gated channel subfamily A member 5     | KCNA5 HUMAN        |
| 26 | Mast/stem cell growth factor receptor Kit                | KIT HUMAN          |
| 27 | Tyrosine-protein kinase SYK                              | KSYP HUMAN         |
| 28 | Leukocyte tyrosine kinase receptor                       | LTK HUMAN          |
| 29 | Mitogen-activated protein kinase kinase kinase 12        | M3K12 HUMAN        |
| 30 | Mitogen-activated protein kinase kinase kinase 14        | M3K14 HUMAN        |
| 31 | MAP kinase-activated protein kinase 2                    | MAPK2 HUMAN        |
| 32 | Melanocortin receptor 3                                  | MC3R HUMAN         |
| 33 | Melanocortin receptor 4                                  | MC4R HUMAN         |
| 34 | Melanocortin receptor 5                                  | MC5R HUMAN         |
| 35 | Mucopolyp-3                                              | MCLN3 HUMAN        |
| 36 | Matrilysin                                               | MMP7 HUMAN         |
| 37 | MAP kinase-interacting serine/threonine-protein kinase 1 | MKNK1 HUMAN        |
| 38 | MAP kinase-interacting serine/threonine-protein kinase 2 | MKNK2 HUMAN        |
| 39 | 72 kDa type IV collagenase                               | MMP2 HUMAN         |
| 40 | Stromelysin-1                                            | MMP3 HUMAN         |
| 41 | Melatonin receptor type 1A                               | MTR1A HUMAN        |
| 42 | Platelet-derived growth factor receptor alpha            | PGFRA HUMAN        |
| 43 | Progesterone receptor                                    | PRGR HUMAN         |
| 44 | DNA-dependent protein kinase catalytic subunit           | PRKDC HUMAN        |
| 45 | cAMP-dependent protein kinase catalytic subunit PRKX     | PRKX HUMAN         |
| 46 | Proteasome subunit beta type-5                           | PSB5 HUMAN         |
| 47 | Presenilin-1                                             | PSN1 HUMAN         |
| 48 | Retinoic acid receptor gamma                             | RARG HUMAN         |
| 49 | Macrophage-stimulating protein receptor                  | RON HUMAN          |
| 50 | Retinoic acid receptor RXR-alpha                         | RXRA HUMAN         |
| 51 | Retinoic acid receptor RXR-beta                          | RXRB HUMAN         |

| ID  | Protein Name                                               | UniProt Entry Name |
|-----|------------------------------------------------------------|--------------------|
| 52  | Sodium-dependent noradrenaline transporter                 | SC6A2 HUMAN        |
| 53  | SRSF protein kinase 1                                      | SRPK1 HUMAN        |
| 54  | Thyrotropin-releasing hormone receptor                     | TRFR HUMAN         |
| 55  | Tyrosine-protein kinase receptor UFO                       | UFO HUMAN          |
| 56  | Vasopressin V2 receptor                                    | V2R HUMAN          |
| 57  | Alpha-2A adrenergic receptor                               | ADA2A HUMAN        |
| 58  | Beta-2 adrenergic receptor                                 | ADRB2 HUMAN        |
| 59  | Type-1 angiotensin II receptor                             | AGTR1 HUMAN        |
| 60  | Type-2 angiotensin II receptor                             | AGTR2 HUMAN        |
| 61  | Aminopeptidase N                                           | AMPN HUMAN         |
| 62  | Androgen receptor                                          | ANDR HUMAN         |
| 63  | Sodium/potassium-transporting ATPase subunit beta-1        | AT1B1 HUMAN        |
| 64  | Sodium/potassium-transporting ATPase subunit beta-2        | AT1B2 HUMAN        |
| 65  | Caspase-1                                                  | CASP1 HUMAN        |
| 66  | Cathepsin B                                                | CATB HUMAN         |
| 67  | Cyclin-dependent kinase 19                                 | CDK19 HUMAN        |
| 68  | Serine/threonine-protein kinase Chk1                       | CHK1 HUMAN         |
| 69  | COUP transcription factor 2                                | COT2 HUMAN         |
| 70  | Corticotropin-releasing factor receptor 1                  | CRFR1 HUMAN        |
| 71  | Corticotropin-releasing factor receptor 2                  | CRFR2 HUMAN        |
| 72  | Casein kinase II subunit alpha                             | CSK21 HUMAN        |
| 73  | Casein kinase II subunit alpha'                            | CSK22 HUMAN        |
| 74  | C-X-C chemokine receptor type 2                            | CXCR2 HUMAN        |
| 75  | C-X-C chemokine receptor type 3                            | CXCR3 HUMAN        |
| 76  | Death-associated protein kinase 3                          | DAPK3 HUMAN        |
| 77  | Dipeptidyl peptidase 4                                     | DPP4 HUMAN         |
| 78  | Receptor tyrosine-protein kinase erbB-2                    | ERBB2 HUMAN        |
| 79  | Receptor tyrosine-protein kinase erbB-3                    | ERBB3 HUMAN        |
| 80  | Receptor tyrosine-protein kinase erbB-4                    | ERBB4 HUMAN        |
| 81  | Focal adhesion kinase 1                                    | FAK1 HUMAN         |
| 82  | Protein-tyrosine kinase 2-beta                             | FAK2 HUMAN         |
| 83  | Free fatty acid receptor 1                                 | FFAR1 HUMAN        |
| 84  | fMet-Leu-Phe receptor                                      | FPR1 HUMAN         |
| 85  | N-formyl peptide receptor 2                                | FPR2 HUMAN         |
| 86  | Metabotropic glutamate receptor 5                          | GRM5 HUMAN         |
| 87  | Inhibitor of nuclear factor kappa-B kinase subunit alpha   | IKKA HUMAN         |
| 88  | Inhibitor of nuclear factor kappa-B kinase subunit beta    | IKKB HUMAN         |
| 89  | Inhibitor of nuclear factor kappa-B kinase subunit epsilon | IKKE HUMAN         |
| 90  | G protein-activated inward rectifier potassium channel 1   | KCNJ3 HUMAN        |
| 91  | G protein-activated inward rectifier potassium channel 4   | KCNJ5 HUMAN        |
| 92  | G protein-activated inward rectifier potassium channel 2   | KCNJ6 HUMAN        |
| 93  | KiSS-1 receptor                                            | KISSR HUMAN        |
| 94  | Ribosomal protein S6 kinase alpha-2                        | KS6A2 HUMAN        |
| 95  | Tyrosine-protein kinase Lck                                | LCK HUMAN          |
| 96  | Misshapen-like kinase 1                                    | MINK1 HUMAN        |
| 97  | Mitogen-activated protein kinase 8                         | MK08 HUMAN         |
| 98  | Mitogen-activated protein kinase 9                         | MK09 HUMAN         |
| 99  | Mitogen-activated protein kinase 10                        | MK10 HUMAN         |
| 100 | Dual specificity mitogen-activated protein kinase kinase 2 | MP2K2 HUMAN        |
| 101 | Serine/threonine-protein kinase Nek1                       | NEK1 HUMAN         |
| 102 | Serine/threonine-protein kinase Nek2                       | NEK2 HUMAN         |
| 103 | Serine/threonine-protein kinase Nek4                       | NEK4 HUMAN         |
| 104 | Mu-type opioid receptor                                    | OPRM HUMAN         |

| ID  | Protein Name                                                      | UniProt Entry Name |
|-----|-------------------------------------------------------------------|--------------------|
| 105 | Nociceptin receptor                                               | OPRX HUMAN         |
| 106 | Prostaglandin E2 receptor EP3 subtype                             | PE2R3 HUMAN        |
| 107 | Prostaglandin E2 receptor EP4 subtype                             | PE2R4 HUMAN        |
| 108 | Lysosomal protective protein                                      | PPGB HUMAN         |
| 109 | Nuclear receptor ROR-gamma                                        | RORG HUMAN         |
| 110 | Proto-oncogene tyrosine-protein kinase ROS                        | ROS1 HUMAN         |
| 111 | Sphingosine 1-phosphate receptor 5                                | S1PR5 HUMAN        |
| 112 | Solute carrier family 40 member 1                                 | S40A1 HUMAN        |
| 113 | Sodium-dependent dopamine transporter                             | SC6A3 HUMAN        |
| 114 | Sodium-dependent serotonin transporter                            | SC6A4 HUMAN        |
| 115 | Sodium- and chloride-dependent glycine transporter 2              | SC6A5 HUMAN        |
| 116 | Sodium channel protein type 1 subunit alpha                       | SCN1A HUMAN        |
| 117 | Sodium channel protein type 2 subunit alpha                       | SCN2A HUMAN        |
| 118 | Sodium/hydrogen exchanger 1                                       | SL9A1 HUMAN        |
| 119 | Sodium/hydrogen exchanger 3                                       | SL9A3 HUMAN        |
| 120 | Prothrombin                                                       | THRB HUMAN         |
| 121 | Transient receptor potential cation channel subfamily V member 1  | TRPV1 HUMAN        |
| 122 | Trypsin-1                                                         | TRY1 HUMAN         |
| 123 | Trypsin-2                                                         | TRY2 HUMAN         |
| 124 | 5-hydroxytryptamine receptor 1B                                   | 5HT1B HUMAN        |
| 125 | 5'-AMP-activated protein kinase catalytic subunit alpha-1         | AAPK1 HUMAN        |
| 126 | Angiotensin-converting enzyme                                     | ACE HUMAN          |
| 127 | Muscarinic acetylcholine receptor M1                              | ACM1 HUMAN         |
| 128 | ALK tyrosine kinase receptor                                      | ALK HUMAN          |
| 129 | Sodium/potassium-transporting ATPase subunit alpha-3              | AT1A3 HUMAN        |
| 130 | Sodium/potassium-transporting ATPase subunit alpha-4              | AT1A4 HUMAN        |
| 131 | Cysteine protease ATG4B                                           | ATG4B HUMAN        |
| 132 | Breakpoint cluster region protein                                 | BCR HUMAN          |
| 133 | Bone morphogenetic protein 1                                      | BMP1 HUMAN         |
| 134 | Voltage-dependent calcium channel subunit alpha-2/delta-1         | CA2D1 HUMAN        |
| 135 | Dipeptidyl peptidase 1                                            | CATC HUMAN         |
| 136 | Complement factor D                                               | CFAD HUMAN         |
| 137 | Calcium release-activated calcium channel protein 1               | CRCM1 HUMAN        |
| 138 | Serine/threonine-protein kinase/endoribonuclease IRE1             | ERN1 HUMAN         |
| 139 | Estrogen receptor beta                                            | ESR2 HUMAN         |
| 140 | G protein-coupled receptor kinase 5                               | GRK5 HUMAN         |
| 141 | Solute carrier family 2, facilitated glucose transporter member 1 | GTR1 HUMAN         |
| 142 | Hydroxycarboxylic acid receptor 2                                 | HCAR2 HUMAN        |
| 143 | cAMP-dependent protein kinase catalytic subunit alpha             | KAPCA HUMAN        |
| 144 | cAMP-dependent protein kinase catalytic subunit beta              | KAPCB HUMAN        |
| 145 | cAMP-dependent protein kinase catalytic subunit gamma             | KAPCG HUMAN        |
| 146 | Casein kinase I isoform epsilon                                   | KC1E HUMAN         |
| 147 | Casein kinase I isoform gamma-1                                   | KC1G1 HUMAN        |
| 148 | Casein kinase I isoform gamma-2                                   | KC1G2 HUMAN        |
| 149 | Casein kinase I isoform gamma-3                                   | KC1G3 HUMAN        |
| 150 | Kallikrein-1                                                      | KLK1 HUMAN         |
| 151 | Leucyl-cystinyl aminopeptidase                                    | LCAP HUMAN         |
| 152 | LIM domain kinase 1                                               | LIMK1 HUMAN        |
| 153 | LIM domain kinase 2                                               | LIMK2 HUMAN        |
| 154 | Leukotriene B4 receptor 1                                         | LT4R1 HUMAN        |
| 155 | Mitogen-activated protein kinase 11                               | MK11 HUMAN         |
| 156 | Mitogen-activated protein kinase 12                               | MK12 HUMAN         |
| 157 | Mitogen-activated protein kinase 13                               | MK13 HUMAN         |

| ID  | Protein Name                                                     | UniProt Entry Name |
|-----|------------------------------------------------------------------|--------------------|
| 158 | Mitogen-activated protein kinase 14                              | MK14 HUMAN         |
| 159 | Stromelysin-2                                                    | MMP10 HUMAN        |
| 160 | Multidrug resistance-associated protein 1                        | MRP1 HUMAN         |
| 161 | Serine/threonine-protein kinase mTOR                             | MTOR HUMAN         |
| 162 | Glutamate receptor ionotropic, NMDA 1                            | NMDZ1 HUMAN        |
| 163 | Neuropeptide Y receptor type 2                                   | NPY2R HUMAN        |
| 164 | Neuropeptide Y receptor type 5                                   | NPY5R HUMAN        |
| 165 | Photoreceptor-specific nuclear receptor                          | NR2E3 HUMAN        |
| 166 | P2Y purinoceptor 2                                               | P2RY2 HUMAN        |
| 167 | Serine/threonine-protein kinase PAK 1                            | PAK1 HUMAN         |
| 168 | Serine/threonine-protein kinase PAK 4                            | PAK4 HUMAN         |
| 169 | Serine/threonine-protein kinase PLK1                             | PLK1 HUMAN         |
| 170 | Prolyl endopeptidase                                             | PPCE HUMAN         |
| 171 | 26S proteasome non-ATPase regulatory subunit 14                  | PSDE HUMAN         |
| 172 | Presenilin-2                                                     | PSN2 HUMAN         |
| 173 | Parathyroid hormone/parathyroid hormone-related peptide receptor | PTH1R HUMAN        |
| 174 | Protein-tyrosine kinase 6                                        | PTK6 HUMAN         |
| 175 | Retinoic acid receptor alpha                                     | RARA HUMAN         |
| 176 | Retinoic acid receptor beta                                      | RARB HUMAN         |
| 177 | Rho-associated protein kinase 1                                  | ROCK1 HUMAN        |
| 178 | Rho-associated protein kinase 2                                  | ROCK2 HUMAN        |
| 179 | High affinity choline transporter 1                              | SC5A7 HUMAN        |
| 180 | Solute carrier organic anion transporter family member 1B1       | SO1B1 HUMAN        |
| 181 | Thyroid hormone receptor alpha                                   | THA HUMAN          |
| 182 | Transmembrane protease serine 6                                  | TMP6 HUMAN         |
| 183 | Urokinase-type plasminogen activator                             | UROK HUMAN         |
| 184 | Vasopressin V1b receptor                                         | V1BR HUMAN         |
| 185 | Tyrosine-protein kinase ZAP-70                                   | ZAP70 HUMAN        |
| 186 | 5-hydroxytryptamine receptor 7                                   | 5HT7R HUMAN        |
| 187 | Neuronal acetylcholine receptor subunit beta-4                   | ACHB4 HUMAN        |
| 188 | Acetylcholine receptor subunit beta                              | ACHB HUMAN         |
| 189 | Activin receptor type-1                                          | ACVR1 HUMAN        |
| 190 | Sodium/potassium-transporting ATPase subunit beta-3              | AT1B3 HUMAN        |
| 191 | Voltage-dependent N-type calcium channel subunit alpha-1B        | CAC1B HUMAN        |
| 192 | Voltage-dependent L-type calcium channel subunit alpha-1C        | CAC1C HUMAN        |
| 193 | Voltage-dependent L-type calcium channel subunit alpha-1D        | CAC1D HUMAN        |
| 194 | Extracellular calcium-sensing receptor                           | CASR HUMAN         |
| 195 | Carboxypeptidase B2                                              | CBPB2 HUMAN        |
| 196 | C-C chemokine receptor type 9                                    | CCR9 HUMAN         |
| 197 | Cyclin-dependent kinase 7                                        | CDK7 HUMAN         |
| 198 | Cyclin-dependent kinase 8                                        | CDK8 HUMAN         |
| 199 | Chemokine-like receptor 1                                        | CML1 HUMAN         |
| 200 | Cannabinoid receptor 2                                           | CNR2 HUMAN         |
| 201 | Dipeptidyl peptidase 2                                           | DPP2 HUMAN         |
| 202 | Endothelin-1 receptor                                            | EDNRA HUMAN        |
| 203 | Endothelin receptor type B                                       | EDNRB HUMAN        |
| 204 | CAAX prenyl protease 2                                           | FACE2 HUMAN        |
| 205 | Gastrin/cholecystokinin type B receptor                          | GASR HUMAN         |
| 206 | Gamma-aminobutyric acid receptor subunit theta                   | GBRT HUMAN         |
| 207 | Glucagon-like peptide 1 receptor                                 | GLP1R HUMAN        |
| 208 | Calcium/calmodulin-dependent protein kinase type II subunit beta | KCC2B HUMAN        |
| 209 | ATP-sensitive inward rectifier potassium channel 1               | KCNJ1 HUMAN        |
| 210 | Potassium voltage-gated channel subfamily KQT member 2           | KCNQ2 HUMAN        |

| ID  | Protein Name                                                   | UniProt Entry Name |
|-----|----------------------------------------------------------------|--------------------|
| 211 | Potassium voltage-gated channel subfamily KQT member 3         | KCNQ3 HUMAN        |
| 212 | Protein kinase C theta type                                    | KPCT HUMAN         |
| 213 | Protein kinase C zeta type                                     | KPCZ HUMAN         |
| 214 | Mitogen-activated protein kinase kinase kinase 20              | M3K20 HUMAN        |
| 215 | Dual specificity mitogen-activated protein kinase kinase 1     | MP2K1 HUMAN        |
| 216 | Nuclear receptor subfamily 5 group A member 2                  | NR5A2 HUMAN        |
| 217 | Proteinase-activated receptor 4                                | PAR4 HUMAN         |
| 218 | PAS domain-containing serine/threonine-protein kinase          | PASK HUMAN         |
| 219 | Peroxisome proliferator-activated receptor alpha               | PPARA HUMAN        |
| 220 | Peroxisome proliferator-activated receptor delta               | PPARD HUMAN        |
| 221 | Peroxisome proliferator-activated receptor gamma               | PPARG HUMAN        |
| 222 | Renin                                                          | RENI HUMAN         |
| 223 | Sodium channel protein type 9 subunit alpha                    | SCN9A HUMAN        |
| 224 | Suppressor of tumorigenicity 14 protein                        | ST14 HUMAN         |
| 225 | Serine/threonine-protein kinase 17A                            | ST17A HUMAN        |
| 226 | Serine/threonine-protein kinase 3                              | STK3 HUMAN         |
| 227 | Urotensin-2 receptor                                           | UR2R HUMAN         |
| 228 | Tyrosine-protein kinase Yes                                    | YES HUMAN          |
| 229 | Neuronal acetylcholine receptor subunit alpha-3                | ACHA3 HUMAN        |
| 230 | Neuronal acetylcholine receptor subunit alpha-4                | ACHA4 HUMAN        |
| 231 | Disintegrin and metalloproteinase domain-containing protein 17 | ADA17 HUMAN        |
| 232 | Alpha-1A adrenergic receptor                                   | ADA1A HUMAN        |
| 233 | Potassium-transporting ATPase alpha chain 1                    | ATP4A HUMAN        |
| 234 | Potassium-transporting ATPase subunit beta                     | ATP4B HUMAN        |
| 235 | Tyrosine-protein kinase Blk                                    | BLK HUMAN          |
| 236 | Caspase-6                                                      | CASP6 HUMAN        |
| 237 | Caspase-7                                                      | CASP7 HUMAN        |
| 238 | C-C chemokine receptor type 1                                  | CCR1 HUMAN         |
| 239 | C-C chemokine receptor type 2                                  | CCR2 HUMAN         |
| 240 | C-C chemokine receptor type 3                                  | CCR3 HUMAN         |
| 241 | Cyclin-dependent kinase 4                                      | CDK4 HUMAN         |
| 242 | Cyclin-dependent-like kinase 5                                 | CDK5 HUMAN         |
| 243 | Cyclin-dependent kinase 6                                      | CDK6 HUMAN         |
| 244 | Dual specificity protein kinase CLK2                           | CLK2 HUMAN         |
| 245 | Dual specificity protein kinase CLK4                           | CLK4 HUMAN         |
| 246 | Chymase                                                        | CMA1 HUMAN         |
| 247 | Cannabinoid receptor 1                                         | CNR1 HUMAN         |
| 248 | Endoplasmic reticulum aminopeptidase 1                         | ERAP1 HUMAN        |
| 249 | Endoplasmic reticulum aminopeptidase 2                         | ERAP2 HUMAN        |
| 250 | Coagulation factor VII                                         | FA7 HUMAN          |
| 251 | Free fatty acid receptor 4                                     | FFAR4 HUMAN        |
| 252 | Fibroblast growth factor receptor 1                            | FGFR1 HUMAN        |
| 253 | Receptor-type tyrosine-protein kinase FLT3                     | FLT3 HUMAN         |
| 254 | Gamma-aminobutyric acid receptor subunit alpha-2               | GBRA2 HUMAN        |
| 255 | Gamma-aminobutyric acid receptor subunit alpha-3               | GBRA3 HUMAN        |
| 256 | Gamma-aminobutyric acid receptor subunit alpha-4               | GBRA4 HUMAN        |
| 257 | Gamma-aminobutyric acid receptor subunit alpha-5               | GBRA5 HUMAN        |
| 258 | Gamma-aminobutyric acid receptor subunit alpha-6               | GBRA6 HUMAN        |
| 259 | Growth hormone secretagogue receptor type 1                    | GHSR HUMAN         |
| 260 | G-protein coupled receptor 84                                  | GPR84 HUMAN        |
| 261 | Glutamate receptor 1                                           | GRIA1 HUMAN        |
| 262 | Glutamate receptor 2                                           | GRIA2 HUMAN        |
| 263 | Glutamate receptor 3                                           | GRIA3 HUMAN        |

| ID  | Protein Name                                                      | UniProt Entry Name |
|-----|-------------------------------------------------------------------|--------------------|
| 264 | Glutamate receptor 4                                              | GRIA4 HUMAN        |
| 265 | Glycogen synthase kinase-3 alpha                                  | GSK3A HUMAN        |
| 266 | Glycogen synthase kinase-3 beta                                   | GSK3B HUMAN        |
| 267 | Mitogen-activated protein kinase kinase kinase 4                  | M4K4 HUMAN         |
| 268 | Mitogen-activated protein kinase kinase kinase 5                  | M4K5 HUMAN         |
| 269 | Methionine aminopeptidase 2                                       | MAP2 HUMAN         |
| 270 | ATP-dependent translocase ABCB1                                   | MDR1 HUMAN         |
| 271 | Neutrophil collagenase                                            | MMP8 HUMAN         |
| 272 | Matrix metalloproteinase-9                                        | MMP9 HUMAN         |
| 273 | Orexin receptor type 2                                            | OX2R HUMAN         |
| 274 | Oxytocin receptor                                                 | OXYR HUMAN         |
| 275 | P2X purinoceptor 2                                                | P2RX2 HUMAN        |
| 276 | Prostaglandin D2 receptor 2                                       | PD2R2 HUMAN        |
| 277 | Prostaglandin D2 receptor                                         | PD2R HUMAN         |
| 278 | Prostacyclin receptor                                             | PI2R HUMAN         |
| 279 | Platelet-activating factor receptor                               | PTAFR HUMAN        |
| 280 | Relaxin receptor 1                                                | RXFP1 HUMAN        |
| 281 | Sphingosine 1-phosphate receptor 1                                | S1PR1 HUMAN        |
| 282 | Sphingosine 1-phosphate receptor 2                                | S1PR2 HUMAN        |
| 283 | Sphingosine 1-phosphate receptor 3                                | S1PR3 HUMAN        |
| 284 | Sphingosine 1-phosphate receptor 4                                | S1PR4 HUMAN        |
| 285 | Sodium/glucose cotransporter 1                                    | SC5A1 HUMAN        |
| 286 | Sodium/glucose cotransporter 2                                    | SC5A2 HUMAN        |
| 287 | Taste receptor type 2 member 8                                    | TA2R8 HUMAN        |
| 288 | Taste receptor type 1 member 1                                    | TS1R1 HUMAN        |
| 289 | Taste receptor type 1 member 3                                    | TS1R3 HUMAN        |
| 290 | Tyrosine-protein kinase receptor TYRO3                            | TYRO3 HUMAN        |
| 291 | 5-hydroxytryptamine receptor 1A                                   | 5HT1A HUMAN        |
| 292 | Adenosine receptor A3                                             | AA3R HUMAN         |
| 293 | Tyrosine-protein kinase ABL1                                      | ABL1 HUMAN         |
| 294 | Tyrosine-protein kinase ABL2                                      | ABL2 HUMAN         |
| 295 | Angiotensin-converting enzyme 2                                   | ACE2 HUMAN         |
| 296 | Acetylcholine receptor subunit delta                              | ACHD HUMAN         |
| 297 | Acetylcholine receptor subunit gamma                              | ACHG HUMAN         |
| 298 | Sodium/potassium-transporting ATPase subunit alpha-1              | AT1A1 HUMAN        |
| 299 | Sodium/potassium-transporting ATPase subunit alpha-2              | AT1A2 HUMAN        |
| 300 | Complement C1s subcomponent                                       | C1S HUMAN          |
| 301 | Cathepsin L1                                                      | CATL1 HUMAN        |
| 302 | Cathepsin L2                                                      | CATL2 HUMAN        |
| 303 | Cyclin-dependent kinase 2                                         | CDK2 HUMAN         |
| 304 | D(2) dopamine receptor                                            | DRD2 HUMAN         |
| 305 | D(3) dopamine receptor                                            | DRD3 HUMAN         |
| 306 | D(4) dopamine receptor                                            | DRD4 HUMAN         |
| 307 | D(1B) dopamine receptor                                           | DRD5 HUMAN         |
| 308 | Dual specificity tyrosine-phosphorylation-regulated kinase 2      | DYRK2 HUMAN        |
| 309 | Dual specificity tyrosine-phosphorylation-regulated kinase 3      | DYRK3 HUMAN        |
| 310 | Coagulation factor X                                              | FA10 HUMAN         |
| 311 | Gamma-aminobutyric acid receptor subunit gamma-3                  | GBRG3 HUMAN        |
| 312 | Gamma-aminobutyric acid receptor subunit pi                       | GBRP HUMAN         |
| 313 | Gonadotropin-releasing hormone receptor                           | GNRHR HUMAN        |
| 314 | Glutamate receptor ionotropic, kainate 2                          | GRIK2 HUMAN        |
| 315 | Interleukin-1 receptor-associated kinase 4                        | IRAK4 HUMAN        |
| 316 | Calcium/calmodulin-dependent protein kinase type II subunit delta | KCC2D HUMAN        |



| ID  | Protein Name                                                      | UniProt Entry Name |
|-----|-------------------------------------------------------------------|--------------------|
| 317 | Calcium/calmodulin-dependent protein kinase type II subunit gamma | KCC2G HUMAN        |
| 318 | ATP-sensitive inward rectifier potassium channel 8                | KCNJ8 HUMAN        |
| 319 | Potassium channel subfamily K member 3                            | KCNK3 HUMAN        |
| 320 | Protein kinase C delta type                                       | KPCD HUMAN         |
| 321 | Protein kinase C epsilon type                                     | KPCE HUMAN         |
| 322 | Protein kinase C gamma type                                       | KPCG HUMAN         |
| 323 | Protein kinase C iota type                                        | KPCI HUMAN         |
| 324 | Protein kinase C eta type                                         | KPCL HUMAN         |
| 325 | Ribosomal protein S6 kinase alpha-3                               | KS6A3 HUMAN        |
| 326 | Ribosomal protein S6 kinase alpha-5                               | KS6A5 HUMAN        |
| 327 | Ribosomal protein S6 kinase beta-1                                | KS6B1 HUMAN        |
| 328 | Mitogen-activated protein kinase kinase kinase kinase 2           | M4K2 HUMAN         |
| 329 | Methionine aminopeptidase 1                                       | MAP11 HUMAN        |
| 330 | Melanin-concentrating hormone receptor 1                          | MCHR1 HUMAN        |
| 331 | Maternal embryonic leucine zipper kinase                          | MELK HUMAN         |
| 332 | Melanocyte-stimulating hormone receptor                           | MSHR HUMAN         |
| 333 | Melatonin receptor type 1B                                        | MTR1B HUMAN        |
| 334 | Nicestrin                                                         | NICA HUMAN         |
| 335 | Proteinase-activated receptor 1                                   | PAR1 HUMAN         |
| 336 | Lysosomal Pro-X carboxypeptidase                                  | PCP HUMAN          |
| 337 | Proprotein convertase subtilisin/kexin type 6                     | PCSK6 HUMAN        |
| 338 | Platelet-derived growth factor receptor beta                      | PGFRB HUMAN        |
| 339 | Serine/threonine-protein kinase N2                                | PKN2 HUMAN         |
| 340 | Serine/threonine-protein kinase PLK4                              | PLK4 HUMAN         |
| 341 | Vitamin K-dependent protein C                                     | PROC HUMAN         |
| 342 | Receptor-interacting serine/threonine-protein kinase 1            | RIPK1 HUMAN        |
| 343 | Somatostatin receptor type 3                                      | SSR3 HUMAN         |
| 344 | Somatostatin receptor type 4                                      | SSR4 HUMAN         |
| 345 | Somatostatin receptor type 5                                      | SSR5 HUMAN         |
| 346 | Thromboxane A2 receptor                                           | TA2R HUMAN         |
| 347 | Serine/threonine-protein kinase TAO1                              | TAOK1 HUMAN        |
| 348 | Serine/threonine-protein kinase TNIN3K                            | TNIN3K HUMAN       |
| 349 | TRAF2 and NCK-interacting protein kinase                          | TNIK HUMAN         |
| 350 | Ubiquitin carboxyl-terminal hydrolase 1                           | UBP1 HUMAN         |
| 351 | Vesicular acetylcholine transporter                               | VACHT HUMAN        |
| 352 | ATP-binding cassette sub-family G member 2                        | ABCG2 HUMAN        |
| 353 | Acetyl-coenzyme A transporter 1                                   | ACATN HUMAN        |
| 354 | Muscarinic acetylcholine receptor M2                              | ACM2 HUMAN         |
| 355 | Muscarinic acetylcholine receptor M3                              | ACM3 HUMAN         |
| 356 | Alpha-2B adrenergic receptor                                      | ADA2B HUMAN        |
| 357 | Alpha-2C adrenergic receptor                                      | ADA2C HUMAN        |
| 358 | Beta-3 adrenergic receptor                                        | ADRB3 HUMAN        |
| 359 | Sodium/potassium-transporting ATPase subunit gamma                | ATNG HUMAN         |
| 360 | Bromodomain-containing protein 4                                  | BRD4 HUMAN         |
| 361 | Caspase-8                                                         | CASP8 HUMAN        |
| 362 | C-C chemokine receptor type 4                                     | CCR4 HUMAN         |
| 363 | Cyclin-dependent kinase 1                                         | CDK1 HUMAN         |
| 364 | Dipeptidyl peptidase 8                                            | DPP8 HUMAN         |
| 365 | Dipeptidyl peptidase 9                                            | DPP9 HUMAN         |
| 366 | Tyrosine-protein kinase FRK                                       | FRK HUMAN          |
| 367 | Tyrosine-protein kinase Fyn                                       | FYN HUMAN          |
| 368 | Glucose-dependent insulinotropic receptor                         | GP119 HUMAN        |
| 369 | G-protein coupled receptor 35                                     | GPR35 HUMAN        |

| ID  | Protein Name                                                       | UniProt Entry Name |
|-----|--------------------------------------------------------------------|--------------------|
| 370 | Metabotropic glutamate receptor 1                                  | GRM1 HUMAN         |
| 371 | Metabotropic glutamate receptor 2                                  | GRM2 HUMAN         |
| 372 | Metabotropic glutamate receptor 4                                  | GRM4 HUMAN         |
| 373 | Hepatocyte nuclear factor 4-alpha                                  | HNF4A HUMAN        |
| 374 | Tyrosine-protein kinase ITK/TSK                                    | ITK HUMAN          |
| 375 | ATP-sensitive inward rectifier potassium channel 11                | KCJ11 HUMAN        |
| 376 | Potassium voltage-gated channel subfamily H member 2               | KCNH2 HUMAN        |
| 377 | Protein kinase C alpha type                                        | KPCA HUMAN         |
| 378 | Protein kinase C beta type                                         | KPCB HUMAN         |
| 379 | Serine/threonine-protein kinase D1                                 | KPCD1 HUMAN        |
| 380 | Serine/threonine-protein kinase D2                                 | KPCD2 HUMAN        |
| 381 | Serine/threonine-protein kinase D3                                 | KPCD3 HUMAN        |
| 382 | Leukotriene B4 receptor 2                                          | LT4R2 HUMAN        |
| 383 | Mineralocorticoid receptor                                         | MCR HUMAN          |
| 384 | Tyrosine-protein kinase Mer                                        | MERTK HUMAN        |
| 385 | Sodium/calcium exchanger 1                                         | NAC1 HUMAN         |
| 386 | Glutamate receptor ionotropic, NMDA 2A                             | NMDE1 HUMAN        |
| 387 | Glutamate receptor ionotropic, NMDA 2B                             | NMDE2 HUMAN        |
| 388 | Glutamate receptor ionotropic, NMDA 2C                             | NMDE3 HUMAN        |
| 389 | Glutamate receptor ionotropic, NMDA 2D                             | NMDE4 HUMAN        |
| 390 | Oxysterols receptor LXR-beta                                       | NR1H2 HUMAN        |
| 391 | Oxysterols receptor LXR-alpha                                      | NR1H3 HUMAN        |
| 392 | Bile acid receptor                                                 | NR1H4 HUMAN        |
| 393 | P2X purinoceptor 3                                                 | P2RX3 HUMAN        |
| 394 | P2X purinoceptor 7                                                 | P2RX7 HUMAN        |
| 395 | P2Y purinoceptor 1                                                 | P2RY1 HUMAN        |
| 396 | 3-phosphoinositide-dependent protein kinase 1                      | PDPK1 HUMAN        |
| 397 | Phosphorylase b kinase gamma catalytic chain, liver/testis isoform | PHKG2 HUMAN        |
| 398 | Sodium channel protein type 3 subunit alpha                        | SCN3A HUMAN        |
| 399 | Sodium channel protein type 5 subunit alpha                        | SCN5A HUMAN        |
| 400 | Sentrin-specific protease 6                                        | SEN6 HUMAN         |
| 401 | Sentrin-specific protease 7                                        | SEN7 HUMAN         |
| 402 | Sentrin-specific protease 8                                        | SEN8 HUMAN         |
| 403 | Serine/threonine-protein kinase Sgk2                               | SGK2 HUMAN         |
| 404 | Solute carrier organic anion transporter family member 1B3         | SO1B3 HUMAN        |
| 405 | Steroidogenic factor 1                                             | STF1 HUMAN         |
| 406 | Trace amine-associated receptor 1                                  | TAAR1 HUMAN        |
| 407 | Vascular endothelial growth factor receptor 1                      | VEGFR1 HUMAN       |
| 408 | 5-hydroxytryptamine receptor 2A                                    | 5HT2A HUMAN        |
| 409 | 5-hydroxytryptamine receptor 2B                                    | 5HT2B HUMAN        |
| 410 | 5-hydroxytryptamine receptor 2C                                    | 5HT2C HUMAN        |
| 411 | 5'-AMP-activated protein kinase catalytic subunit alpha-2          | AAPK2 HUMAN        |
| 412 | Bile salt export pump                                              | ABCB11 HUMAN       |
| 413 | Neuronal acetylcholine receptor subunit alpha-7                    | ACHA7 HUMAN        |
| 414 | Atypical chemokine receptor 3                                      | ACKR3 HUMAN        |
| 415 | Disintegrin and metalloproteinase domain-containing protein 10     | ADA10 HUMAN        |
| 416 | Bombesin receptor subtype-3                                        | BRS3 HUMAN         |
| 417 | Serine/threonine-protein kinase BRSK1                              | BRSK1 HUMAN        |
| 418 | Tyrosine-protein kinase BTK                                        | BTK HUMAN          |
| 419 | Calcitonin gene-related peptide type 1 receptor                    | CALRL HUMAN        |
| 420 | Caspase-3                                                          | CASP3 HUMAN        |
| 421 | Cathepsin D                                                        | CATD HUMAN         |
| 422 | Cholecystokinin receptor type A                                    | CCKAR HUMAN        |

| ID  | Protein Name                                              | UniProt Entry Name |
|-----|-----------------------------------------------------------|--------------------|
| 423 | Dual specificity protein kinase CLK1                      | CLK1 HUMAN         |
| 424 | Cysteinyl leukotriene receptor 1                          | CLTR1 HUMAN        |
| 425 | Cysteinyl leukotriene receptor 2                          | CLTR2 HUMAN        |
| 426 | C-X-C chemokine receptor type 4                           | CXCR4 HUMAN        |
| 427 | Enteropeptidase                                           | ENTK HUMAN         |
| 428 | Steroid hormone receptor ERR1                             | ERR1 HUMAN         |
| 429 | Furin                                                     | FURIN HUMAN        |
| 430 | Gamma-aminobutyric acid receptor subunit delta            | GBRD HUMAN         |
| 431 | Gamma-aminobutyric acid receptor subunit epsilon          | GBRE HUMAN         |
| 432 | Gamma-aminobutyric acid receptor subunit gamma-1          | GBRG1 HUMAN        |
| 433 | Gamma-aminobutyric acid receptor subunit gamma-2          | GBRG2 HUMAN        |
| 434 | Glucocorticoid receptor                                   | GCR HUMAN          |
| 435 | G-protein coupled bile acid receptor 1                    | GPBAR HUMAN        |
| 436 | Tyrosine-protein kinase HCK                               | HCK HUMAN          |
| 437 | Interleukin-1 receptor-associated kinase 1                | IRAK1 HUMAN        |
| 438 | Hepatocyte growth factor receptor                         | MET HUMAN          |
| 439 | Neprilysin                                                | NEP HUMAN          |
| 440 | Neuromedin-K receptor                                     | NK3R HUMAN         |
| 441 | Neuropeptides B/W receptor type 1                         | NPBW1 HUMAN        |
| 442 | NPC intracellular cholesterol transporter 1               | NPC1 HUMAN         |
| 443 | Neuropeptide Y receptor type 1                            | NPY1R HUMAN        |
| 444 | Nuclear receptor subfamily 1 group I member 2             | NR1I2 HUMAN        |
| 445 | Neurotensin receptor type 1                               | NTR1 HUMAN         |
| 446 | Serine/threonine-protein kinase pim-1                     | PIM1 HUMAN         |
| 447 | Serine/threonine-protein kinase pim-2                     | PIM2 HUMAN         |
| 448 | Serine/threonine-protein kinase pim-3                     | PIM3 HUMAN         |
| 449 | RAF proto-oncogene serine/threonine-protein kinase        | RAF1 HUMAN         |
| 450 | Retinoic acid receptor RXR-gamma                          | RXRG HUMAN         |
| 451 | Solute carrier family 22 member 12                        | S22AC HUMAN        |
| 452 | Equilibrative nucleoside transporter 1                    | S29A1 HUMAN        |
| 453 | Vascular endothelial growth factor receptor 2             | VGFR2 HUMAN        |
| 454 | Vascular endothelial growth factor receptor 3             | VGFR3 HUMAN        |
| 455 | Wee1-like protein kinase                                  | WEE1 HUMAN         |
| 456 | 5-hydroxytryptamine receptor 3A                           | 5HT3A HUMAN        |
| 457 | 5-hydroxytryptamine receptor 3B                           | 5HT3B HUMAN        |
| 458 | 5-hydroxytryptamine receptor 3C                           | 5HT3C HUMAN        |
| 459 | 5-hydroxytryptamine receptor 3D                           | 5HT3D HUMAN        |
| 460 | 5-hydroxytryptamine receptor 3E                           | 5HT3E HUMAN        |
| 461 | 5-hydroxytryptamine receptor 4                            | 5HT4R HUMAN        |
| 462 | 5-hydroxytryptamine receptor 5A                           | 5HT5A HUMAN        |
| 463 | 5-hydroxytryptamine receptor 6                            | 5HT6R HUMAN        |
| 464 | ATP-binding cassette sub-family C member 8                | ABCC8 HUMAN        |
| 465 | ATP-binding cassette sub-family C member 9                | ABCC9 HUMAN        |
| 466 | Muscarinic acetylcholine receptor M4                      | ACM4 HUMAN         |
| 467 | Muscarinic acetylcholine receptor M5                      | ACM5 HUMAN         |
| 468 | Beta-1 adrenergic receptor                                | ADRB1 HUMAN        |
| 469 | RAC-alpha serine/threonine-protein kinase                 | AKT1 HUMAN         |
| 470 | RAC-beta serine/threonine-protein kinase                  | AKT2 HUMAN         |
| 471 | RAC-gamma serine/threonine-protein kinase                 | AKT3 HUMAN         |
| 472 | Serine-protein kinase ATM                                 | ATM HUMAN          |
| 473 | C5a anaphylatoxin chemotactic receptor 1                  | C5AR1 HUMAN        |
| 474 | Voltage-dependent L-type calcium channel subunit alpha-1F | CAC1F HUMAN        |
| 475 | Voltage-dependent T-type calcium channel subunit alpha-1G | CAC1G HUMAN        |

| ID  | Protein Name                                                                   | UniProt Entry Name |
|-----|--------------------------------------------------------------------------------|--------------------|
| 476 | Voltage-dependent T-type calcium channel subunit alpha-1H                      | CAC1H HUMAN        |
| 477 | Voltage-dependent T-type calcium channel subunit alpha-1I                      | CAC1I HUMAN        |
| 478 | Voltage-dependent L-type calcium channel subunit alpha-1S                      | CAC1S HUMAN        |
| 479 | Calpain-1 catalytic subunit                                                    | CAN1 HUMAN         |
| 480 | Calpain-2 catalytic subunit                                                    | CAN2 HUMAN         |
| 481 | Cathepsin K                                                                    | CATK HUMAN         |
| 482 | Cystic fibrosis transmembrane conductance regulator                            | CFTR HUMAN         |
| 483 | Serine/threonine-protein kinase Chk2                                           | CHK2 HUMAN         |
| 484 | Epithelial discoidin domain-containing receptor 1                              | DDR1 HUMAN         |
| 485 | D(1A) dopamine receptor                                                        | DRD1 HUMAN         |
| 486 | Dual specificity tyrosine-phosphorylation-regulated kinase 1A                  | DYR1A HUMAN        |
| 487 | Dual specificity tyrosine-phosphorylation-regulated kinase 1B                  | DYR1B HUMAN        |
| 488 | Endothelin-converting enzyme 1                                                 | ECE1 HUMAN         |
| 489 | Neutrophil elastase                                                            | ELNE HUMAN         |
| 490 | Coagulation factor IX                                                          | FA9 HUMAN          |
| 491 | Glutamate carboxypeptidase 2                                                   | FOLH1 HUMAN        |
| 492 | Homeodomain-interacting protein kinase 2                                       | HIPK2 HUMAN        |
| 493 | Homeodomain-interacting protein kinase 4                                       | HIPK4 HUMAN        |
| 494 | Histamine H1 receptor                                                          | HRH1 HUMAN         |
| 495 | Histamine H2 receptor                                                          | HRH2 HUMAN         |
| 496 | Histamine H3 receptor                                                          | HRH3 HUMAN         |
| 497 | Histamine H4 receptor                                                          | HRH4 HUMAN         |
| 498 | Epoxide hydrolase 1                                                            | HYEP HUMAN         |
| 499 | Tyrosine-protein kinase JAK2                                                   | JAK2 HUMAN         |
| 500 | Tyrosine-protein kinase JAK1                                                   | JAK1 HUMAN         |
| 501 | Tyrosine-protein kinase JAK3                                                   | JAK3 HUMAN         |
| 502 | Casein kinase I isoform alpha                                                  | KC1A HUMAN         |
| 503 | Casein kinase I isoform delta                                                  | KC1D HUMAN         |
| 504 | Leucine-rich repeat serine/threonine-protein kinase 2                          | LRRK2 HUMAN        |
| 505 | Mitogen-activated protein kinase 3                                             | MK03 HUMAN         |
| 506 | Mitogen-activated protein kinase 1                                             | MK01 HUMAN         |
| 507 | Interstitial collagenase                                                       | MMP1 HUMAN         |
| 508 | Motilin receptor                                                               | MTLR HUMAN         |
| 509 | Substance-P receptor                                                           | NK1R HUMAN         |
| 510 | Substance-K receptor                                                           | NK2R HUMAN         |
| 511 | Neuropeptide S receptor                                                        | NPSR1 HUMAN        |
| 512 | Ileal sodium/bile acid cotransporter                                           | NTCP2 HUMAN        |
| 513 | High affinity nerve growth factor receptor                                     | NTRK1 HUMAN        |
| 514 | BDNF/NT-3 growth factors receptor                                              | NTRK2 HUMAN        |
| 515 | NT-3 growth factor receptor                                                    | NTRK3 HUMAN        |
| 516 | P2Y purinoceptor 12                                                            | P2Y12 HUMAN        |
| 517 | [Pyruvate dehydrogenase (acetyl-transferring)] kinase isozyme 1, mitochondrial | PDK1 HUMAN         |
| 518 | [Pyruvate dehydrogenase (acetyl-transferring)] kinase isozyme 2, mitochondrial | PDK2 HUMAN         |
| 519 | [Pyruvate dehydrogenase (acetyl-transferring)] kinase isozyme 3, mitochondrial | PDK3 HUMAN         |
| 520 | [Pyruvate dehydrogenase (acetyl-transferring)] kinase isozyme 4, mitochondrial | PDK4 HUMAN         |
| 521 | Prostaglandin E2 receptor EP1 subtype                                          | PE2R1 HUMAN        |
| 522 | Prostaglandin E2 receptor EP2 subtype                                          | PE2R2 HUMAN        |
| 523 | Perforin-1                                                                     | PERF HUMAN         |
| 524 | Serine/threonine-protein kinase PLK3                                           | PLK3 HUMAN         |

| ID  | Protein Name                                                     | UniProt Entry Name |
|-----|------------------------------------------------------------------|--------------------|
| 525 | Sodium- and chloride-dependent glycine transporter 1             | SC6A9 HUMAN        |
| 526 | Sodium channel protein type 10 subunit alpha                     | SCNAA HUMAN        |
| 527 | Sentrin-specific protease 1                                      | SEN1P1 HUMAN       |
| 528 | Prolyl endopeptidase FAP                                         | SEPR HUMAN         |
| 529 | STE20-like serine/threonine-protein kinase                       | SLK HUMAN          |
| 530 | Smoothened homolog                                               | SMO HUMAN          |
| 531 | Somatostatin receptor type 1                                     | SSR1 HUMAN         |
| 532 | Somatostatin receptor type 2                                     | SSR2 HUMAN         |
| 533 | Serine/threonine-protein kinase TBK1                             | TBK1 HUMAN         |
| 534 | TGF-beta receptor type-1                                         | TGFR1 HUMAN        |
| 535 | Lymphokine-activated killer T-cell-originated protein kinase     | TOPK HUMAN         |
| 536 | Transient receptor potential cation channel subfamily V member 3 | TRPV3 HUMAN        |
| 537 | Transient receptor potential cation channel subfamily V member 4 | TRPV4 HUMAN        |
| 538 | Trypsin-3                                                        | TRY3 HUMAN         |
| 539 | Non-receptor tyrosine-protein kinase TYK2                        | TYK2 HUMAN         |
| 540 | 5-hydroxytryptamine receptor 1D                                  | 5HT1D HUMAN        |
| 541 | Acetylcholine receptor subunit alpha                             | ACHA HUMAN         |
| 542 | Neuronal acetylcholine receptor subunit beta-2                   | ACHB2 HUMAN        |
| 543 | Alpha-1B adrenergic receptor                                     | ADA1B HUMAN        |
| 544 | Alpha-1D adrenergic receptor                                     | ADA1D HUMAN        |
| 545 | Beta-adrenergic receptor kinase 1                                | ARBK1 HUMAN        |
| 546 | A disintegrin and metalloproteinase with thrombospondin motifs 4 | ATS4 HUMAN         |
| 547 | A disintegrin and metalloproteinase with thrombospondin motifs 5 | ATS5 HUMAN         |
| 548 | Cathepsin G                                                      | CATG HUMAN         |
| 549 | Cell division cycle 7-related protein kinase                     | CDC7 HUMAN         |
| 550 | C-X-C chemokine receptor type 1                                  | CXCR1 HUMAN        |
| 551 | Epidermal growth factor receptor                                 | EGFR HUMAN         |
| 552 | Ephrin type-B receptor 4                                         | EPHB4 HUMAN        |
| 553 | Estrogen receptor                                                | ESR1 HUMAN         |
| 554 | Coagulation factor XI                                            | FA11 HUMAN         |
| 555 | Coagulation factor XII                                           | FA12 HUMAN         |
| 556 | Fibroblast growth factor receptor 2                              | FGFR2 HUMAN        |
| 557 | Fibroblast growth factor receptor 3                              | FGFR3 HUMAN        |
| 558 | Fibroblast growth factor receptor 4                              | FGFR4 HUMAN        |
| 559 | Gamma-aminobutyric acid receptor subunit beta-1                  | GBRB1 HUMAN        |
| 560 | Gamma-aminobutyric acid receptor subunit beta-2                  | GBRB2 HUMAN        |
| 561 | Gamma-aminobutyric acid receptor subunit beta-3                  | GBRB3 HUMAN        |
| 562 | Glutamate receptor ionotropic, kainate 1                         | GRIK1 HUMAN        |
| 563 | Integrin-linked protein kinase                                   | ILK HUMAN          |
| 564 | Insulin receptor                                                 | INSR HUMAN         |
| 565 | Kallikrein-7                                                     | KLK7 HUMAN         |
| 566 | Plasma kallikrein                                                | KLKB1 HUMAN        |
| 567 | Leukotriene A-4 hydrolase                                        | LKHA4 HUMAN        |
| 568 | Tyrosine-protein kinase Lyn                                      | LYN HUMAN          |
| 569 | Mitogen-activated protein kinase kinase kinase 5                 | M3K5 HUMAN         |
| 570 | Mitogen-activated protein kinase kinase kinase 7                 | M3K7 HUMAN         |
| 571 | Mitogen-activated protein kinase kinase kinase 8                 | M3K8 HUMAN         |
| 572 | Serine/threonine-protein kinase MARK2                            | MARK2 HUMAN        |
| 573 | MAP/microtubule affinity-regulating kinase 3                     | MARK3 HUMAN        |
| 574 | Macrophage metalloelastase                                       | MMP12 HUMAN        |
| 575 | Collagenase 3                                                    | MMP13 HUMAN        |
| 576 | Matrix metalloproteinase-14                                      | MMP14 HUMAN        |
| 577 | Serine/threonine-protein kinase MRCK alpha                       | MRCKA HUMAN        |

| ID  | Protein Name                                                     | UniProt Entry Name |
|-----|------------------------------------------------------------------|--------------------|
| 578 | Glutamate receptor ionotropic, NMDA 3A                           | NMD3A HUMAN        |
| 579 | Glutamate receptor ionotropic, NMDA 3B                           | NMD3B HUMAN        |
| 580 | Nuclear receptor subfamily 4 group A member 1                    | NR4A1 HUMAN        |
| 581 | Delta-type opioid receptor                                       | OPRD HUMAN         |
| 582 | Kappa-type opioid receptor                                       | OPRK HUMAN         |
| 583 | Orexin receptor type 1                                           | OX1R HUMAN         |
| 584 | Plasminogen                                                      | PLMN HUMAN         |
| 585 | Proto-oncogene tyrosine-protein kinase receptor Ret              | RET HUMAN          |
| 586 | Proto-oncogene tyrosine-protein kinase Src                       | SRC HUMAN          |
| 587 | Thyroid hormone receptor beta                                    | THB HUMAN          |
| 588 | Angiopoietin-1 receptor                                          | TIE2 HUMAN         |
| 589 | Tissue-type plasminogen activator                                | TPA HUMAN          |
| 590 | Transient receptor potential cation channel subfamily A member 1 | TRPA1 HUMAN        |
| 591 | Transient receptor potential cation channel subfamily M member 8 | TRPM8 HUMAN        |
| 592 | Tryptase alpha/beta-1                                            | TRYB1 HUMAN        |
| 593 | Tryptase delta                                                   | TRYD HUMAN         |
| 594 | Tryptase gamma                                                   | TRYG1 HUMAN        |
| 595 | Thyrotropin receptor                                             | TSHR HUMAN         |
| 596 | Dual specificity protein kinase TTK                              | TTK HUMAN          |
| 597 | Ubiquitin carboxyl-terminal hydrolase 2                          | UBP2 HUMAN         |
| 598 | Vasopressin V1a receptor                                         | V1AR HUMAN         |
| 599 | Vitamin D3 receptor                                              | VDR HUMAN          |

Table S2. List of reference compounds used in CGBSP.

| ChEMBL ID     | Structure                                                                            | IC <sub>50</sub> (nM) |
|---------------|--------------------------------------------------------------------------------------|-----------------------|
| CHEMBL437612  | 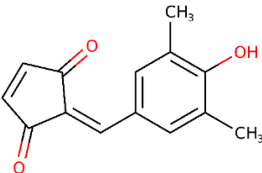 | 440                   |
| CHEMBL1093057 |  | 990                   |
| CHEMBL1091317 |  | 220                   |

| ChEMBL ID     | Structure                                                                            | IC <sub>50</sub> (nM) |
|---------------|--------------------------------------------------------------------------------------|-----------------------|
| CHEMBL1089016 | 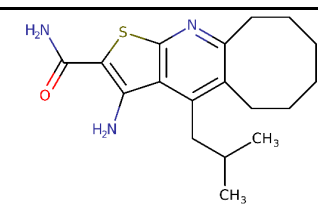   | 860                   |
| CHEMBL1090045 |    | 860                   |
| CHEMBL1094038 |   | 640                   |
| CHEMBL1091829 |  | 320                   |
| CHEMBL1091830 |  | 460                   |
| CHEMBL1089330 |  | 940                   |
| CHEMBL1092378 |  | 990                   |

| ChEMBL ID     | Structure                                                                            | IC <sub>50</sub> (nM) |
|---------------|--------------------------------------------------------------------------------------|-----------------------|
| CHEMBL1094026 | 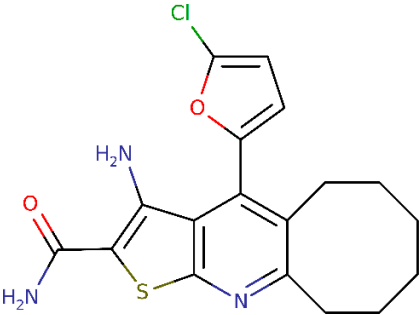   | 280                   |
| CHEMBL1089019 |   | 300                   |
| CHEMBL1091074 |  | 330                   |
| CHEMBL1091075 |  | 660                   |



| ChEMBL ID     | Structure                                                                            | IC <sub>50</sub> (nM) |
|---------------|--------------------------------------------------------------------------------------|-----------------------|
| CHEMBL1091459 | 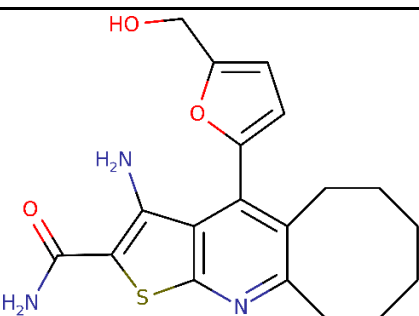   | 800                   |
| CHEMBL1092820 |    | 170                   |
| CHEMBL1091450 |   | 350                   |
| CHEMBL1094018 |  | 110                   |
| CHEMBL3327225 |  | 930                   |

| ChEMBL ID     | Structure                                                                          | IC <sub>50</sub> (nM) |
|---------------|------------------------------------------------------------------------------------|-----------------------|
| CHEMBL1977874 | 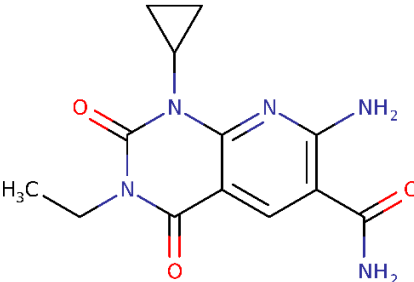 | 280                   |

Table S3. List of compounds tested for *in vitro* inhibitory activity.

| ID        | Structure                                                                           | Enamine ID      | Reference <sup>1</sup> | Similarity <sup>2</sup> | % Inh. |
|-----------|-------------------------------------------------------------------------------------|-----------------|------------------------|-------------------------|--------|
| compound1 | 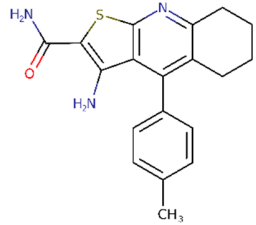  | Z90664459       | CHEMBL1089330          | 0.729412                | 14.5   |
| compound2 |  | Z57147099       | CHEMBL1089330          | 0.415842                | 74.1   |
| compound3 |  | Z160320077<br>1 | CHEMBL1090045          | 0.195122                | 2      |
| compound4 |  | Z57076017       | CHEMBL1090045          | 0.44898                 | 29.4   |
| compound5 |  | Z56823152       | CHEMBL1090045          | 0.2                     | -5.2   |

| ID         | Structure                                                                           | Enamine ID | Reference <sup>1</sup> | Similarity <sup>2</sup> | %<br>Inh. |
|------------|-------------------------------------------------------------------------------------|------------|------------------------|-------------------------|-----------|
| compound6  | 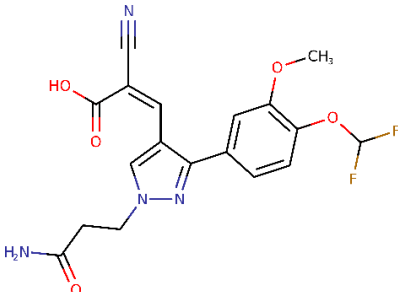   | Z56347366  | CHEMBL1090045          | 0.179104                | -0.2      |
| compound7  |    | Z51103017  | CHEMBL1090045          | 0.161538                | -5.7      |
| compound8  |   | Z18546119  | CHEMBL1090045          | 0.162791                | -0.2      |
| compound9  |  | Z841115344 | CHEMBL1090045          | 0.1875                  | 2         |
| compound10 |  | Z56172877  | CHEMBL3327225          | 0.168224                | 5.7       |
| compound11 |  | Z18545629  | CHEMBL1090045          | 0.173554                | 3.9       |
| compound12 |  | Z48843107  | CHEMBL1090045          | 0.266667                | -2.1      |

| ID         | Structure                                                                           | Enamine ID      | Reference <sup>1</sup> | Similarity <sup>2</sup> | %<br>Inh. |
|------------|-------------------------------------------------------------------------------------|-----------------|------------------------|-------------------------|-----------|
| compound13 | 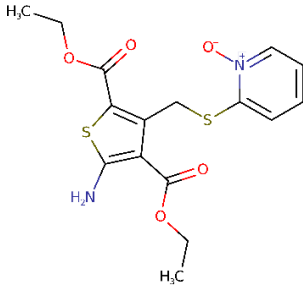   | Z18545771       | CHEMBL1090045          | 0.165354                | 32.5      |
| compound14 |    | Z91875706       | CHEMBL1090045          | 0.234043                | -2        |
| compound15 |   | Z56347605       | CHEMBL1090045          | 0.195122                | -1.3      |
| compound16 |  | Z193664632      | CHEMBL1090045          | 0.137931                | -4.4      |
| compound17 |  | Z910722708      | CHEMBL1090045          | 0.153226                | -4.6      |
| compound18 |  | Z276380028<br>3 | CHEMBL1090045          | 0.204918                | -8.2      |
| compound19 |  | Z243705728<br>7 | CHEMBL1090045          | 0.256637                | -1.1      |
| compound20 |  | Z369440552      | CHEMBL1090045          | 0.1875                  | -0.3      |

| ID         | Structure                                                                           | Enamine ID      | Reference <sup>1</sup> | Similarity <sup>2</sup> | %<br>Inh. |
|------------|-------------------------------------------------------------------------------------|-----------------|------------------------|-------------------------|-----------|
| compound21 | 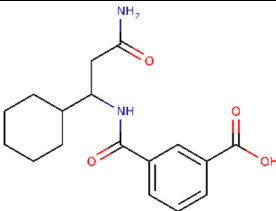   | Z187047921<br>7 | CHEMBL1090045          | 0.265487                | -1.9      |
| compound22 |    | Z127858899<br>0 | CHEMBL1090045          | 0.165217                | -4        |
| compound23 |    | Z144419360<br>3 | CHEMBL1090045          | 0.196581                | -3.1      |
| compound24 |   | Z48811112       | CHEMBL1090045          | 0.254545                | 0.8       |
| compound25 |  | Z56800556       | CHEMBL1090045          | 0.185185                | -5.4      |
| compound26 |  | Z56847740       | CHEMBL3327225          | 0.179775                | 0.9       |
| compound27 |  | Z56800859       | CHEMBL1090045          | 0.153846                | -2.4      |

<sup>1</sup>Most similar compound to test compound, <sup>2</sup>Morgan fingerprint similarity between test and reference compounds
